# Supplementary material
Source: publisher figshare collection journal article supplement (https://acs.figshare.com/ndownloader/files/4133353)
Supplement: Supplementary file 1 [file 4133353]

##############################################################################
###      FullProf-generated CIF output file  (version: February 2008)      ###
###      Template of CIF submission form for structure report              ###
##############################################################################
 
# This file has been generated using FullProf.2k taking one example of 
# structure report provided by Acta Cryst. It is given as a 'template' with 
# filled structural items. Many other items are left unfilled and it is the  
# responsibility of the user to properly fill or suppress them. In principle 
# all question marks '?' should be replaced by the appropriate text or 
# numerical value depending on the kind of CIF item. 
# See the document: cif_core.dic (URL: http://www.iucr.org) for details. 
 
# Please notify any error or suggestion to: 
#           Juan Rodriguez-Carvajal (jrc@ill.eu)
# Improvements will be progressively added as needed.
 
#=============================================================================
 data_global
#=============================================================================
 
# PROCESSING SUMMARY (IUCr Office Use Only)
 
_journal_data_validation_number      ?
 
_journal_date_recd_electronic        ?
_journal_date_to_coeditor            ?
_journal_date_from_coeditor          ?
_journal_date_accepted               ?
_journal_date_printers_first         ?
_journal_date_printers_final         ?
_journal_date_proofs_out             ?
_journal_date_proofs_in              ?
_journal_coeditor_name               ?
_journal_coeditor_code               ?
_journal_coeditor_notes
; ?
;
_journal_techeditor_code             ?
_journal_techeditor_notes
; ?
;
_journal_coden_ASTM                  ?
_journal_name_full                   ?
_journal_year                        ?
_journal_volume                      ?
_journal_issue                       ?
_journal_page_first                  ?
_journal_page_last                   ?
_journal_paper_category              ?
_journal_suppl_publ_number           ?
_journal_suppl_publ_pages            ?
 
#=============================================================================
 
# 1. SUBMISSION DETAILS
 
_publ_contact_author_name            ?  # Name of author for correspondence
_publ_contact_author_address            # Address of author for correspondence
; ?
;
_publ_contact_author_email           ?
_publ_contact_author_fax             ?
_publ_contact_author_phone           ?
 
_publ_contact_letter
; ?
;
 
_publ_requested_journal              ?
_publ_requested_coeditor_name        ?
_publ_requested_category             ?   # Acta C: one of CI/CM/CO/FI/FM/FO
 
 
# Definition of non standard CIF items (Reliability indices used in FULLPROF) 
 
loop_ 
_publ_manuscript_incl_extra_item
_publ_manuscript_incl_extra_info
_publ_manuscript_incl_extra_defn
#      Name                               Explanation                 Standard?
#     ------                              -----------                 ---------
 '_pd_proc_ls_prof_cR_factor'    'Prof. R-factor CORRECTED for background'   no
 '_pd_proc_ls_prof_cwR_factor'   'wProf.R-factor CORRECTED for background'   no
 '_pd_proc_ls_prof_cwR_expected' 'wProf.Expected CORRECTED for background'   no
 '_pd_proc_ls_prof_chi2'         'Chi-square for all considered points'      no
 '_pd_proc_ls_prof_echi2'        'Chi-2 for points with Bragg contribution'  no
#=============================================================================
 
# 3. TITLE AND AUTHOR LIST
 
_publ_section_title
; 'SQ13se_PA'
;
_publ_section_title_footnote
;
;
 
# The loop structure below should contain the names and addresses of all 
# authors, in the required order of publication. Repeat as necessary.
 
loop_
    _publ_author_name
    _publ_author_footnote
    _publ_author_address
?                                   #<--'Last name, first name' 
; ?
;
; ?
;
 
#=============================================================================
 
# 4. TEXT
 
_publ_section_synopsis
;  ?
;
_publ_section_abstract
; ?
;          
_publ_section_comment
; ?
;
_publ_section_exptl_prep      # Details of the preparation of the sample(s)
                              # should be given here. 
; ?
;
_publ_section_exptl_refinement
; ?
;
_publ_section_references
; ?
;
_publ_section_figure_captions
; ?
;
_publ_section_acknowledgements
; ?
;
 
#=============================================================================
 
#=============================================================================
# If more than one structure is reported, the remaining sections should be 
# completed per structure. For each data set, replace the '?' in the
# data_? line below by a unique identifier.
 
data_SQ13se_PA                     
 
#=============================================================================
 
# 5. CHEMICAL DATA
 
_chemical_name_systematic
; ?
;
_chemical_name_common             ?
_chemical_formula_moiety          'C22 H32 N4 O6'
_chemical_formula_structural      'C22 H32 N4 O6'
_chemical_formula_analytical      ?
_chemical_formula_iupac           ?
_chemical_formula_sum             'C22 H32 N4 O6'
_chemical_formula_weight          448
_chemical_melting_point           ?
_chemical_compound_source         ?       # for minerals and 
                                          # natural products
 
loop_
    _atom_type_symbol               
    _atom_type_scat_Cromer_Mann_a1 
    _atom_type_scat_Cromer_Mann_b1 
    _atom_type_scat_Cromer_Mann_a2 
    _atom_type_scat_Cromer_Mann_b2 
    _atom_type_scat_Cromer_Mann_a3 
    _atom_type_scat_Cromer_Mann_b3 
    _atom_type_scat_Cromer_Mann_a4 
    _atom_type_scat_Cromer_Mann_b4 
    _atom_type_scat_Cromer_Mann_c 
    _atom_type_scat_dispersion_real 
    _atom_type_scat_dispersion_imag 
    _atom_type_scat_source          
c      2.31000  20.84390   1.02000  10.20750   1.58860   0.56870
       0.86500  51.65120   0.21560   0.01700   0.00900
 International_Tables_for_Crystallography_Vol.C(1991)_Tables_6.1.1.4_and_6.1.1.5
n     12.21260   0.00570   3.13220   9.89330   2.01250  28.99750
       1.16630   0.58260 -11.52900   0.02900   0.01800
 International_Tables_for_Crystallography_Vol.C(1991)_Tables_6.1.1.4_and_6.1.1.5
h      0.49300  10.51090   0.32291  26.12570   0.14019   3.14236
       0.04081  57.79970   0.00304   0.00000   0.00000
 International_Tables_for_Crystallography_Vol.C(1991)_Tables_6.1.1.4_and_6.1.1.5
o      3.04850  13.27710   2.28680   5.70110   1.54630   0.32390
       0.86700  32.90890   0.25080   0.04700   0.03200
 International_Tables_for_Crystallography_Vol.C(1991)_Tables_6.1.1.4_and_6.1.1.5
 
#=============================================================================
 
# 6. POWDER SPECIMEN AND CRYSTAL DATA
 
_symmetry_cell_setting                Monoclinic
_symmetry_space_group_name_H-M       'P 21/c'
_symmetry_space_group_name_Hall      '-P 2ybc'
 
loop_
    _symmetry_equiv_pos_as_xyz   #<--must include 'x,y,z'
'x,y,z'
'-x,y+1/2,-z+1/2'
'-x,-y,-z'
'x,-y+1/2,z+1/2'
 
_cell_length_a                       16.37064(12)
_cell_length_b                       10.00640(6)
_cell_length_c                       7.27971(3)
_cell_angle_alpha                    90.00000
_cell_angle_beta                     98.8213(5)
_cell_angle_gamma                    90.00000
_cell_volume                         1178.392(12)
_cell_formula_units_Z                2
_cell_measurement_temperature        293
_cell_special_details
; ?
;
# The next three fields give the specimen dimensions in mm.  The equatorial
# plane contains the incident and diffracted beam.
 
_pd_spec_size_axial               ?       # perpendicular to 
                                          # equatorial plane
_pd_spec_size_equat               ?       # parallel to 
                                          # scattering vector
                                          # in transmission
_pd_spec_size_thick               ?       # parallel to 
                                          # scattering vector
                                          # in reflection
 
# The next five fields are character fields that describe the specimen.
 
_pd_spec_mounting                         # This field should be
                                          # used to give details of the 
                                          # container.
; ?
;
_pd_spec_mount_mode               ?       # options are 'reflection'
                                          # or 'transmission'
_pd_spec_shape                    ?       # options are 'cylinder' 
                                          # 'flat_sheet' or 'irregular'
_pd_char_particle_morphology      ?
_pd_char_colour                   'colourless'       
 
# The following three fields describe the preparation of the specimen.
# The cooling rate is in K/min.  The pressure at which the sample was 
# prepared is in kPa.  The temperature of preparation is in K.        
 
_pd_prep_cool_rate                ?
_pd_prep_pressure                 ?
_pd_prep_temperature              ?
 
# The next four fields are normally only needed for transmission experiments.
 
_exptl_absorpt_coefficient_mu        ?
_exptl_absorpt_correction_type       ?
_exptl_absorpt_process_details       ?
_exptl_absorpt_correction_T_min      ?
_exptl_absorpt_correction_T_max      ?
 
#=============================================================================
 
# 7. EXPERIMENTAL DATA
 
_exptl_special_details
; ?
;
 
# The following item is used to identify the equipment used to record 
# the powder pattern when the diffractogram was measured at a laboratory 
# other than the authors' home institution, e.g. when neutron or synchrotron
# radiation is used.
 
_pd_instr_location
; ?
;
_pd_calibration_special_details           # description of the method used
                                          # to calibrate the instrument
; ?
;
 
_diffrn_ambient_temperature          293
_diffrn_source                   'rotating-anode X-ray tube'  
_diffrn_radiation_type            'Cu K\a'
_diffrn_radiation_wavelength      1.54175
_diffrn_source_target             ?
 
_diffrn_radiation_monochromator      ?
_diffrn_measurement_device_type      ?
_diffrn_measurement_method           ?
_diffrn_detector_area_resol_mean     ?   # Not in version 2.0.1
_diffrn_detector                     ?
_diffrn_detector_type                ?   # make or model of detector
_pd_meas_scan_method                 ?   # options are 'step', 'cont',
                                         # 'tof', 'fixed' or
                                         # 'disp' (= dispersive)
_pd_meas_special_details
;  ?
;
 
#  The following four items give details of the measured (not processed)
#  powder pattern.  Angles are in degrees.
 
_pd_meas_number_of_points         5076
_pd_meas_2theta_range_min         4.00700
_pd_meas_2theta_range_max         69.98200
_pd_meas_2theta_range_inc         0.013003
 
#=============================================================================
 
# 8. REFINEMENT DATA
 
_refine_special_details
; ?
;
 
# Use the next field to give any special details about the fitting of the
# powder pattern.
 
_pd_proc_ls_special_details
; ?
;
 
# The next three items are given as text.
 
_pd_proc_ls_profile_function      ?
_pd_proc_ls_background_function   ?
_pd_proc_ls_pref_orient_corr
; ?
;
 
#  The following profile R-factors are NOT CORRECTED for background
#  The sum is extended to all non-excluded points.
#  These are the current CIF standard
 
_pd_proc_ls_prof_R_factor                1.7992
_pd_proc_ls_prof_wR_factor               2.6220
_pd_proc_ls_prof_wR_expected             0.8762
 
#  The following profile R-factors are CORRECTED for background
#  The sum is extended to all non-excluded points.
#  These items are not in the current CIF standard, but are defined above
 
_pd_proc_ls_prof_cR_factor                5.1071
_pd_proc_ls_prof_cwR_factor               5.3979
_pd_proc_ls_prof_cwR_expected             1.8038
 
#  The following items are not in the CIF standard, but are defined above
 
_pd_proc_ls_prof_chi2                 8.9549
_pd_proc_ls_prof_echi2                9.4885
 
#  Items related to LS refinement
 
_refine_ls_R_I_factor                 1.1076
_refine_ls_number_reflns                  1205
_refine_ls_number_parameters               139
_refine_ls_number_restraints                87
 
# The following four items apply to angular dispersive measurements.
# 2theta minimum, maximum and increment (in degrees) are for the 
# intensities used in the refinement.
 
_pd_proc_2theta_range_min                4.0066
_pd_proc_2theta_range_max               69.9816
_pd_proc_2theta_range_inc              0.013003
_pd_proc_wavelength                    ?
 
_pd_block_diffractogram_id        ?  # The id used for the block containing
                                     # the powder pattern profile (section 11)
 
# Give appropriate details in the next two text fields.
 
_pd_proc_info_excluded_regions    ?
_pd_proc_info_data_reduction      ?
 
# The following items are used to identify the programs used.
 
_computing_data_collection           ?
_computing_structure_solution        ?
_computing_structure_refinement      FULLPROF
_computing_molecular_graphics        ?
_computing_publication_material      ?
 
#=============================================================================
 
# 9. ATOMIC COORDINATES AND DISPLACEMENT PARAMETERS
 
loop_
    _atom_site_label
    _atom_site_fract_x
    _atom_site_fract_y
    _atom_site_fract_z
    _atom_site_U_iso_or_equiv
    _atom_site_occupancy
    _atom_site_adp_type              # Not in version 2.0.1
    _atom_site_type_symbol
 C1   0.5180(4)   0.5497(6)   0.3264(7)   0.0592(15)  1.00000    Uiso C   
 C2   0.5440(5)   0.5707(6)   0.6591(10)  0.0592(15)  1.00000    Uiso C   
 N3   0.5795(3)   0.5514(6)   0.4924(8)   0.049(2)    1.00000    Uiso N   
 H4   0.54914     0.53794     0.19817     0.061(7)    1.00000    Uiso H   
 H5   0.48094     0.64530     0.32911     0.061(7)    1.00000    Uiso H   
 H6   0.58923     0.51867     0.76268     0.061(7)    1.00000    Uiso H   
 C7   0.6434(3)   0.6573(5)   0.4679(8)   0.0592(15)  1.00000    Uiso C   
 H8   0.61435     0.75228     0.52030     0.061(7)    1.00000    Uiso H   
 H9   0.6627(13)  0.684(2)    0.3312(19)  0.061(7)     1.00000    Uiso H   
 C10   0.7240(4)   0.6412(6)   0.6087(7)   0.0592(15)  1.00000    Uiso C   
 H11   0.72464     0.65088     0.76755     0.061(7)    1.00000    Uiso H   
 H12   0.76164     0.71806     0.54046     0.061(7)    1.00000    Uiso H   
 C13   0.7713(4)   0.5201(5)   0.5513(8)   0.0592(15)  1.00000    Uiso C   
 H14   0.78032     0.53033     0.40181     0.061(7)    1.00000    Uiso H   
 H15   0.83813     0.52308     0.60245     0.061(7)    1.00000    Uiso H   
 N16   0.7232(3)   0.3963(5)   0.5472(10)  0.049(2)    1.00000    Uiso N   
 H17   0.65840     0.40294     0.52708     0.061(7)    1.00000    Uiso H   
 C18   0.7575(4)   0.2762(6)   0.5470(18)  0.0592(15)  1.00000    Uiso C   
 C19   0.7193(4)   0.1402(7)   0.5493(18)  0.0592(15)  1.00000    Uiso C   
 C20   0.8389(4)   0.2251(6)   0.5581(18)  0.0592(15)  1.00000    Uiso C   
 C21   0.8053(4)   0.0865(6)   0.5480(14)  0.0592(15)  1.00000    Uiso C   
 O22   0.6521(3)   0.0980(5)   0.5394(8)   0.0703(17)  1.00000    Uiso O   
 O23   0.8386(3)  -0.0239(5)   0.5443(8)   0.0703(17)  1.00000    Uiso O   
 O24   0.9115(3)   0.2816(5)   0.5635(8)   0.0703(17)  1.00000    Uiso O   
 C25   0.9791(4)   0.1925(5)   0.5580(8)   0.0592(15)  1.00000    Uiso C   
 H26   0.97947     0.16485     0.41675     0.061(7)    1.00000    Uiso H   
 C27   1.0531(4)   0.2845(7)   0.5901(9)   0.0592(15)  1.00000    Uiso C   
 H28   1.038(3)    0.386(2)    0.541(8)    0.061(7)    1.00000    Uiso H   
 H29   1.1070(18)  0.259(6)    0.526(6)    0.061(7)    1.00000    Uiso H   
 H30   1.070(3)    0.285(6)    0.7414(16)  0.061(7)    1.00000    Uiso H   
 H31   0.97336     0.12761     0.67511     0.061(7)    1.00000    Uiso H   
 H32   0.515(3)    0.668(2)    0.680(6)    0.061(7)    1.00000    Uiso H   
 
# Note: if the displacement parameters were refined anisotropically
# the U matrices should be given as for single-crystal studies.
 
#=============================================================================
 
# 10. DISTANCES AND ANGLES / MOLECULAR GEOMETRY 
 
_geom_special_details                ?
 
loop_
    _geom_bond_atom_site_label_1  
    _geom_bond_atom_site_label_2  
    _geom_bond_site_symmetry_1    
    _geom_bond_site_symmetry_2    
    _geom_bond_distance           
    _geom_bond_publ_flag          
    ?   ?   ?   ?   ?   ?
 C1 N3  ? ?  1.450(7)      ?
 C1 H4  ? ?     1.14       ?
 C1 H5  ? ?     1.13   ?
 C2 N3  ? ?     1.44(1)    ?
 C2 H6  ? ?     1.10   ?
 C2 H32 ? ?      1.10(3)   ?
 N3 C7  ? ?     1.519(8)   ?
 C7 H8  ? ?     1.15   ?
 C7 H9  ? ?     1.12(2)   ?
 C7 C10 ? ?      1.550(7)  ?
 C10 H11 ? ?     1.16   ?
 C10 H12 ? ?     1.15   ?
 C10 C13 ? ?     1.530(8)   ?
 C13 H14 ? ?     1.13   ?
 C13 H15 ? ?     1.10   ?
 C13 N16 ? ?    1.466(7)    ?
 N16 H17 ? ?     1.05   ?
 N16 C18 ? ?     1.327(8)   ?
 C18 C19 ? ?     1.499(9)   ?
 C18 C20 ? ?     1.418(9)   ?
 C19 C21  ? ?    1.51(1)   ?
 C19 O22  ? ?    1.170(8)  ?
 C20 C21  ? ?    1.490(9)  ?
 C20 O24  ? ?    1.311(8)  ?
 C21 O23  ? ?    1.234(8)  ?
 O24 C25  ? ?    1.426(8)  ?
 C25 H26  ? ?    1.07  ?
 C25 C27  ? ?    1.511(9)  ?
 C25 H31  ? ?    1.09  ?
 C27 H28  ? ?    1.09(3)   ?
 C27 H29  ? ?    1.09(4)   ?
 C27 H30  ? ?    1.09(1)   ?
        
 
 loop_
    _geom_contact_atom_site_label_1 
    _geom_contact_atom_site_label_2 
    _geom_contact_distance          
    _geom_contact_site_symmetry_1   
    _geom_contact_site_symmetry_2   
    _geom_contact_publ_flag         
    ?   ?   ?   ?   ?   ?
 
loop_
_geom_angle_atom_site_label_1 
_geom_angle_atom_site_label_2 
_geom_angle_atom_site_label_3 
_geom_angle_site_symmetry_1   
_geom_angle_site_symmetry_2   
_geom_angle_site_symmetry_3   
_geom_angle                   
_geom_angle_publ_flag         
?   ?   ?   ?   ?   ?   ?   ?
N3 C1 H4    ?   ?   ?  110.00     ?   
N3 C1 H5    ?   ?   ?  106.00     ?   
H4 C1 H5    ?   ?   ?  114.00     ?   
N3 C2 H6    ?   ?   ?  101.00     ?   
N3 C2 H32   ?   ?   ?  118(2)     ?   
H6 C2 H32   ?   ?   ?  125.00     ?   
C1 N3 C2    ?   ?   ?  112.7(5)   ?   
C1 N3 C7    ?   ?   ?  108.3(5)   ?   
C2 N3 C7    ?   ?   ?  112.4(5)   ?   
N3 C7 H8    ?   ?   ?  102.00     ?   
N3 C7 H9    ?   ?   ?  124.3(11)  ?  
N3 C7 C10   ?   ?   ?  112.4(4)   ?   
H8 C7 H9    ?   ?   ?  106.00     ?   
H8 C7 C10   ?   ?   ?  103.00     ?   
H9 C7 C10   ?   ?   ?  106.5(11)  ?   
C7 C10 H11  ?   ?   ?  122.00     ?  
C7 C10 H12  ?   ?   ?  96.00      ?  
C7 C10 C13  ?   ?   ?  108.5(5)   ?  
H11 C10 H12 ?   ?   ?  117.00     ? 
H11 C10 C13 ?   ?   ?  114.00     ? 
H12 C10 C13 ?   ?   ?  95.00      ? 
C10 C13 H14 ?   ?   ?  110.00     ? 
C10 C13 H15 ?   ?   ?  114.00     ? 
C10 C13 N16 ?   ?   ?  112.5(5)   ? 
H14 C13 H15 ?   ?   ?  93.00      ? 
H14 C13 N16 ?   ?   ?  102.00     ? 
H15 C13 N16 ?   ?   ?  122.00     ? 
C13 N16 H17 ?   ?   ?  119.00     ? 
C13 N16 C18 ?   ?   ?  122.7(6)   ? 
H17 N16 C18 ?   ?   ?  118.00     ? 
N16 C18 C19 ?   ?   ?  130.2(8)   ? 
N16 C18 C20 ?   ?   ?  136.1(8)   ? 
C19 C18 C20 ?   ?   ?  93.6(7)    ? 
C18 C19 C21 ?   ?   ?  86.1(6)    ? 
C18 C19 O22 ?   ?   ?  135.8(8)   ? 
C21 C19 O22 ?   ?   ?  137.8(8)   ? 
C18 C20 C21 ?   ?   ?  89.8(7)    ? 
C18 C20 O24 ?   ?   ?  133.3(8)   ? 
C21 C20 O24 ?   ?   ?  136.8(8)   ? 
C19 C21 C20 ?   ?   ?  90.3(6)    ? 
C19 C21 O23 ?   ?   ?  137.3(7)   ? 
C20 C21 O23 ?   ?   ?  132.3(7)   ? 
C20 O24 C25 ?   ?   ?  115.7(6)   ? 
O24 C25 H26 ?   ?   ?  108.00     ? 
O24 C25 C27 ?   ?   ?  102.8(5)   ? 
O24 C25 H31 ?   ?   ?  101.00     ? 
H26 C25 C27 ?   ?   ?  101.00     ? 
H26 C25 H31 ?   ?   ?  128.00     ? 
C27 C25 H31 ?   ?   ?  114.00     ? 
C25 C27 H28 ?   ?   ?  112(2)     ? 
C25 C27 H29 ?   ?   ?  120(2)     ? 
C25 C27 H30 ?   ?   ?  104(2)     ? 
H28 C27 H29 ?   ?   ?  104(3)     ? 
H28 C27 H30 ?   ?   ?  110(3)     ? 
H29 C27 H30 ?   ?   ?  110(3)     ? 
            


 
loop_
_geom_torsion_atom_site_label_1 
_geom_torsion_atom_site_label_2 
_geom_torsion_atom_site_label_3 
_geom_torsion_atom_site_label_4 
_geom_torsion_site_symmetry_1   
_geom_torsion_site_symmetry_2   
_geom_torsion_site_symmetry_3   
_geom_torsion_site_symmetry_4   
_geom_torsion                   
_geom_torsion_publ_flag         
?   ?   ?   ?   ?   ?   ?   ?   ?   ?
 
loop_
_geom_hbond_atom_site_label_D 
_geom_hbond_atom_site_label_H 
_geom_hbond_atom_site_label_A 
_geom_hbond_site_symmetry_D   
_geom_hbond_site_symmetry_H   
_geom_hbond_site_symmetry_A   
_geom_hbond_distance_DH       
_geom_hbond_distance_HA       
_geom_hbond_distance_DA       
_geom_hbond_angle_DHA         
_geom_hbond_publ_flag         
?   ?   ?   ?   ?   ?   ?   ?   ?   ?   ?
 
#=============================================================================
 
#=============================================================================
# Additional structures (last six sections and associated data_? identifiers) 
# may be added at this point.                                                 
#=============================================================================
 
# The following lines are used to test the character set of files sent by     
# network email or other means. They are not part of the CIF data set.        
# abcdefghijklmnopqrstuvwxyzABCDEFGHIJKLMNOPQRSTUVWXYZ0123456789              
# !@#$%^&*()_+{}:"~<>?|\-=[];'`,./ 
